# Supplementary material for: Biodegradable self-assembly micelles significantly enhanced the solubility, biological stability and in vivo antitumor efficacy of Hexylselen
Source: Royal Society of Chemistry journal article supplement (doi:10.1039/d1cb00089f), 2021-01-01
Supplement: d1cb00089f1.pdf [file d1cb00089f1.pdf]

**Electronic Supplementary information (ESI): Biodegradable Self-assembly Micelles  
Significantly Enhanced Solubility, Biological Stability and *in vivo* Antitumor Efficacy of  
Hexylselen**

Jinzhang Fang<sup>‡</sup>, Zhao Chen<sup>‡</sup>, Jun Song, Jinxiu Li, Yunying Han, Wei Hou, Wenxi Wang and  
Benfang H. Ruan\*

**Table S1. The Solubility of CPD-3B in Different Solvents (25 °C, n ≥ 3)**

|                                            | <b>Dissolving substances</b>                   | <b>Solubility (mg/mL)</b> |
|--------------------------------------------|------------------------------------------------|---------------------------|
| <b>Aqueous solvent</b>                     | Water                                          | 0.0016 ± 0.00005          |
|                                            | HCl solution (pH=1.2)                          | 0.0022 ± 0.00026          |
|                                            | Sodium Acetate buffer (pH=4.5)                 | 0.0013 ± 0.00047          |
|                                            | Phosphate Buffer Saline (pH=7.4)               | 0.0008 ± 0.00015          |
| <b>Hydrophilic solvent</b>                 | DMSO                                           | 33.81 ± 0.70              |
|                                            | DMF                                            | 17.31 ± 0.32              |
|                                            | MeOH                                           | 1.41 ± 0.13               |
|                                            | EtOH                                           | 1.28 ± 0.04               |
|                                            | Acetonitrile                                   | 0.42 ± 0.005              |
|                                            | Acetone                                        | 0.44 ± 0.04               |
|                                            | Isopropyl Alcohol                              | 0.98 ± 0.06               |
| <b>Hydrophobic solvent</b>                 | Ethyl Acetate                                  | 0.24 ± 0.02               |
|                                            | 1-Octanol                                      | 1.06 ± 0.08               |
|                                            | DCM                                            | 3.17 ± 0.16               |
| <b>Liquid excipient</b>                    | Propylene glycol                               | 1.05 ± 0.02               |
|                                            | Glycerine                                      | 0.04 ± 0.001              |
|                                            | PEG200                                         | 2.95 ± 0.07               |
|                                            | PEG400                                         | 2.38 ± 0.08               |
|                                            | Tween20                                        | 1.06 ± 0.02               |
|                                            | Tween80                                        | 0.51 ± 0.02               |
| <b>Solid excipients (10%<br/>solution)</b> | Poloxamer 188 (F68)                            | 0.013 ± 0.003             |
|                                            | Poloxamer 407 (F127)                           | 0.098 ± 0.008             |
|                                            | Soluplus                                       | 0.515 ± 0.008             |
|                                            | Hydropropyl-β-Cyclodextrin (HP-β-CD)           | 0.060 ± 0.003             |
|                                            | Sulfobutylether-β-Cyclodextrin (SBE -<br>β-CD) | 0.071 ± 0.004             |
|                                            | PEG2000                                        | 0.007 ± 0.002             |
|                                            | PEG4000                                        | 0.008 ± 0.001             |
|                                            | PEG6000                                        | 0.006 ± 0.001             |

**Table S2. The Inhibition Tumor Cell Growth by CPD-3B@SOL Micelles**

| <b>Samples</b>             | <b>H22 (IC<sub>50</sub>: μM)</b> | <b>A549 (IC<sub>50</sub>: μM)</b> |
|----------------------------|----------------------------------|-----------------------------------|
| <b>Free CPD-3B</b>         | 1.51 ± 0.04                      | 1.39 ± 0.07                       |
| <b>CPD-3B@SOL micelles</b> | 1.75 ± 0.02                      | 2.79 ± 0.18                       |
| <b>Blank SOL micelles</b>  | > 30                             | > 30                              |

**Table S3. The  $t_{1/2}$  and Clearance rates of CPD-3B vehicle and CPD-3B@SOL micelles in liver microsomes ( $n \geq 3$ )**

| <b>Samples</b>             | <b>Fitted equation</b>                    | <b><math>k_e</math></b> | <b><math>t_{1/2}</math> (h)</b> | <b>CL (L/h/g)</b> |
|----------------------------|-------------------------------------------|-------------------------|---------------------------------|-------------------|
| <b>Free CPD-3B</b>         | $\ln C = -1.1204t + 4.4351; R^2 = 0.9782$ | -1.1204                 | 0.62                            | 134.4             |
| <b>CPD-3B@SOL micelles</b> | $\ln C = -0.1298t + 4.4975; R^2 = 0.9505$ | -0.1298                 | 5.34                            | 15.6              |
| <b>Coumarin</b>            | $\ln C = -0.5783t + 4.6404; R^2 = 0.9922$ | -0.5783                 | 1.20                            | 69.4              |

Notes:  $k_e$ : the slope of the relationship of  $\ln C$  (compound concentration) and  $t$  (incubated time);  $t_{1/2}$ : half-time life;  $CL_{int}$ : intrinsic Clearance.

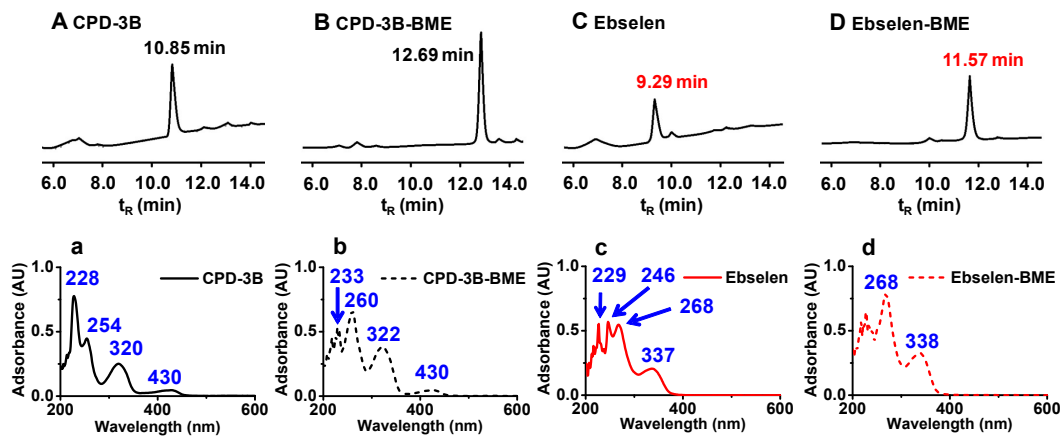

**Figure S1. The HPLC (A, B, C, D) and UV (a, b, c, d) Spectrograms of CPD-3B, Ebselen, CPD-3B BME Derivative and Ebselen BME Derivative.**

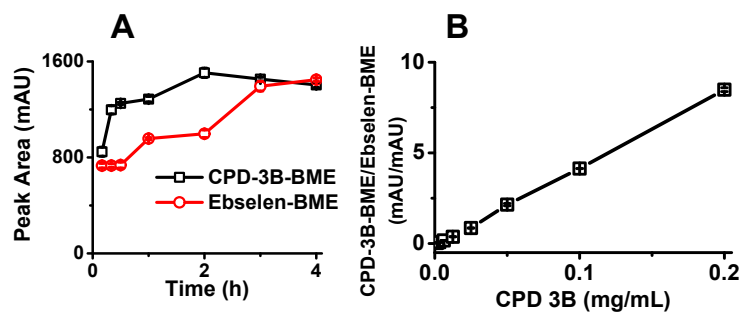

**Figure S2. The Correlation of Peak Area to deriving time (A-t) of CPD-3B-BME and Ebselen-BME and Standard Curve for CPD-3B Quantification. A: The optimizing derivatization time for CPD-3B and Ebselen; B: The standard curve for quantifying CPD-3B by CPD-3B-BME and internal standard Ebselen-BME: Peak areas of CPD-3B-BME ( $A_m$ ) and Ebselen-BME ( $A_n$ ), and the relation of  $A_m/A_n$  to  $C_{CPD-3B}$  produced equation  $A_m/A_n = 42.984C - 0.1155$ ,  $R^2 = 0.9995$ , range of 1-200  $\mu\text{g/mL}$ .**
